# Supplementary material for: Joint Analysis of Psychiatric Disorders Increases Accuracy of Risk Prediction for Schizophrenia, Bipolar Disorder, and Major Depressive Disorder
Source: PubMed Central journal article supplement — Am J Hum Genet. 2015 Feb 5;96(2):283–94. doi: 10.1016/j.ajhg.2014.12.006 (PMC4320268; doi:10.1016/j.ajhg.2014.12.006), 2015-02-05
Supplement: mmc1.pdf [file mmc1.pdf]

The American Journal of Human Genetics

Supplemental Data

**Joint Analysis of Psychiatric Disorders Increases  
Accuracy of Risk Prediction for Schizophrenia,  
Bipolar Disorder, and Major Depressive Disorder**

Robert Maier, Gerhard Moser, Guo-Bo Chen, Stephan Ripke, Cross disorder Working group of the Psychiatric Genomics Consortium, William Coryell, James B. Potash, William A. Scheftner, Jianxin Shi, Myrna M. Weissman, Christina M. Hultman, Mikael Landén, Douglas F. Levinson, Kenneth S. Kendler, Jordan W. Smoller, Naomi R. Wray, and S. Hong Lee

## Supplementary data

### A. Heritability

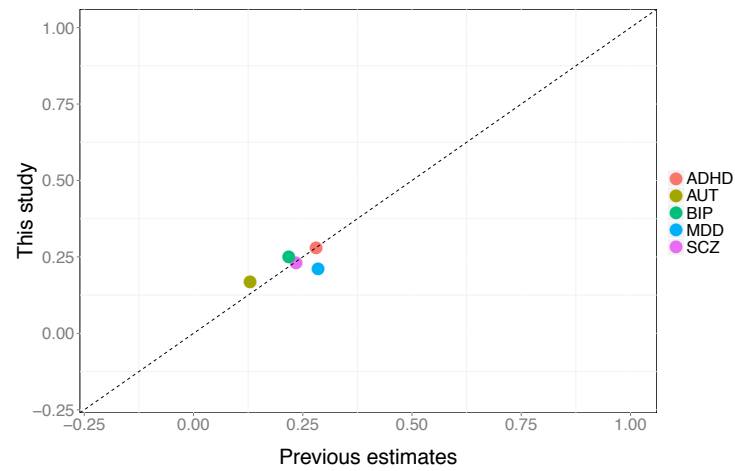

### B. Genetic correlations

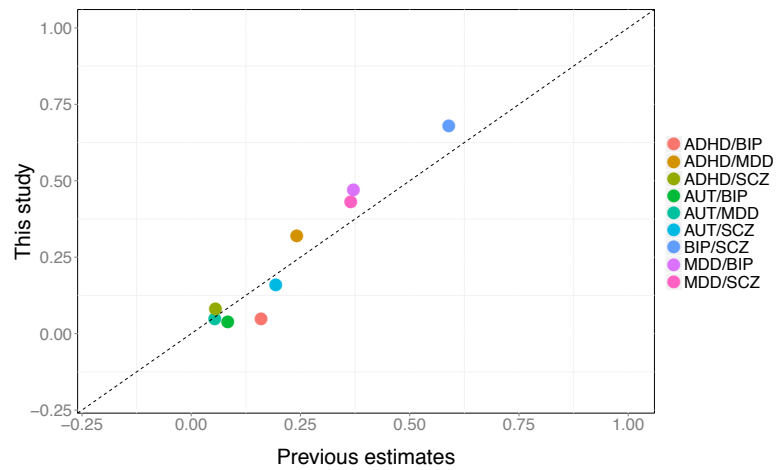

### C. SNP-coheritability

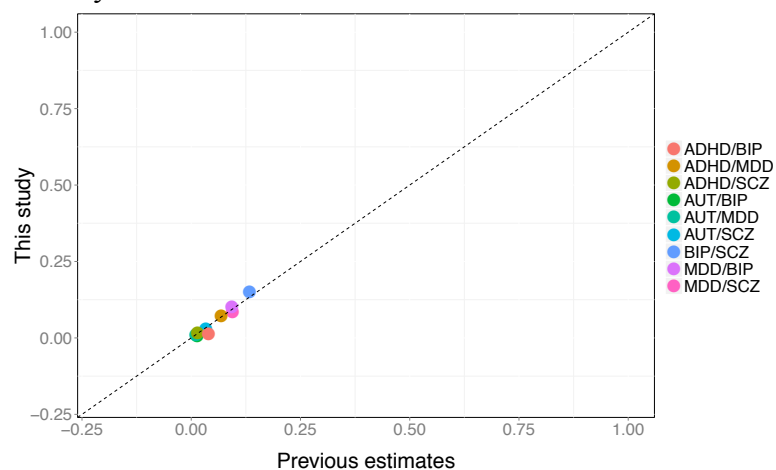

Figure S1. Previous estimates (Lee et al. 2013) plotted against estimates from this study for 5 psychiatric disorders. Both studies and the previous utilised the same data. However, the previous estimates used a bivariate model and so overlapping and closely related samples were excluded on a pairwise basis. In this study overlapping

samples and closely related samples were removed across all 5 disorders generating small samples per disease. A. SNP-heritability (correlation coefficient between previous and current estimates = 0.69); B. Genetic correlations (correlation coefficient between previous and current estimates = 0.98); C. SNP-coheritability (correlation coefficient between previous and current estimates = 0.98)

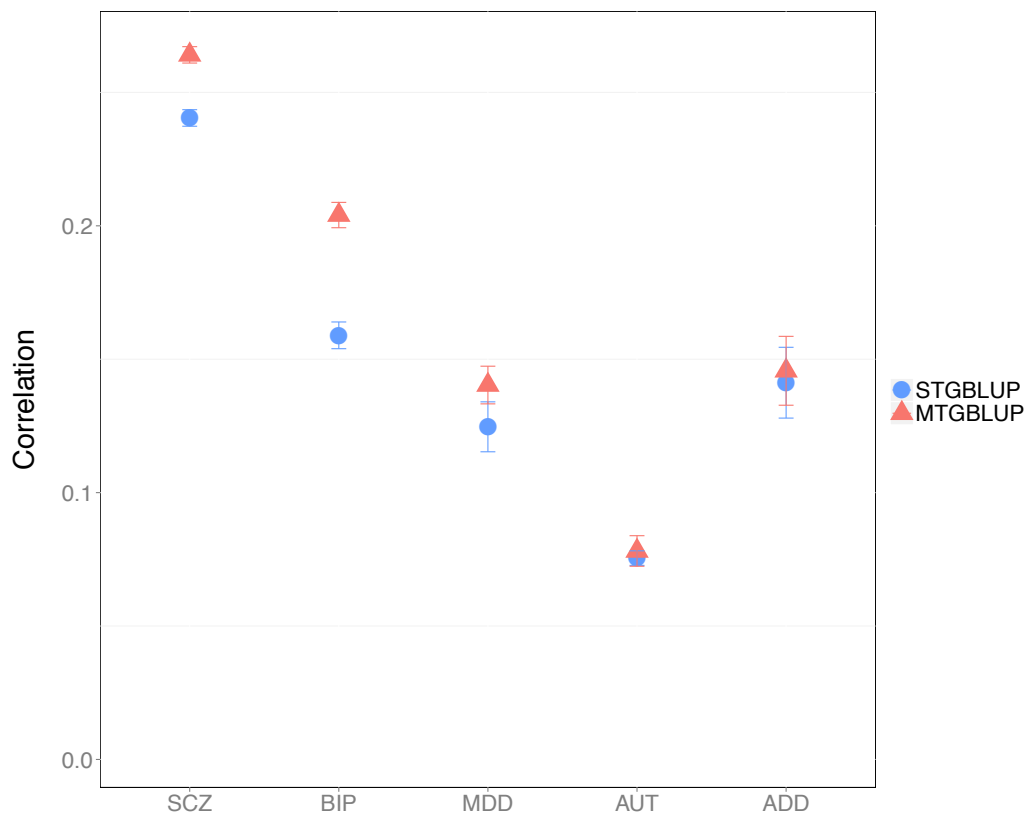

Figure S2. Prediction accuracy of MTGBLUP and STGBLUP for five psychiatric disorders in the within-study validation of PCG. Results are based on 5 replicates. Error bars are  $\pm$  empirical standard error. Prediction accuracy is measured as the mean of the correlation coefficient between the true disease status and the predicted genomic risk score in the validation data.

### A. Schizophrenia

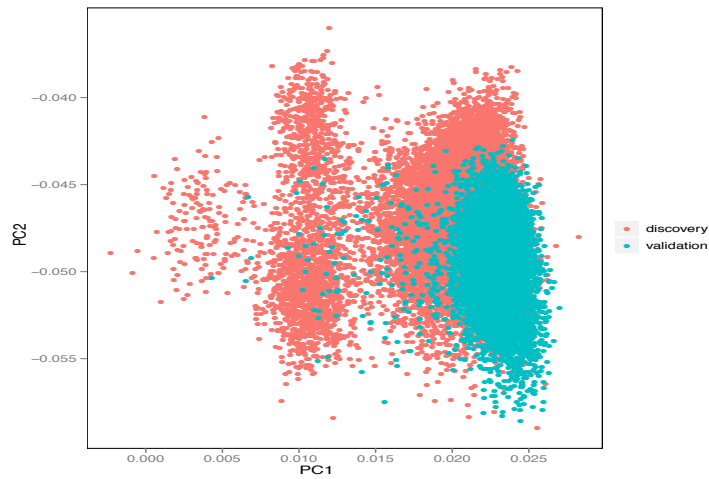

### B. Bipolar disorder

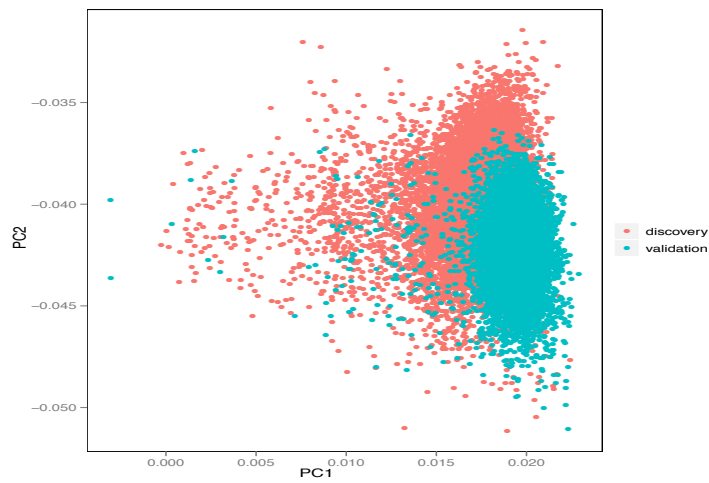

### C. Major depressive disorder

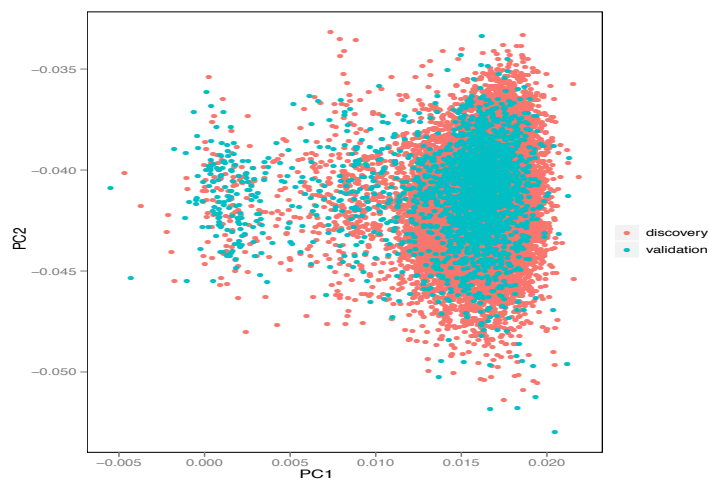

Figure S3. Principal component analysis based on the projected PC from POPRES for SCZ (A), BIP (B) and MDD (C). The same SNPs were selected from the discovery and validation set and used to project PC in each disorder. The number of SNPs used was 745,631 for SCZ, 645,237 for BIP and 673,109 for MDD.

### A. Schizophrenia

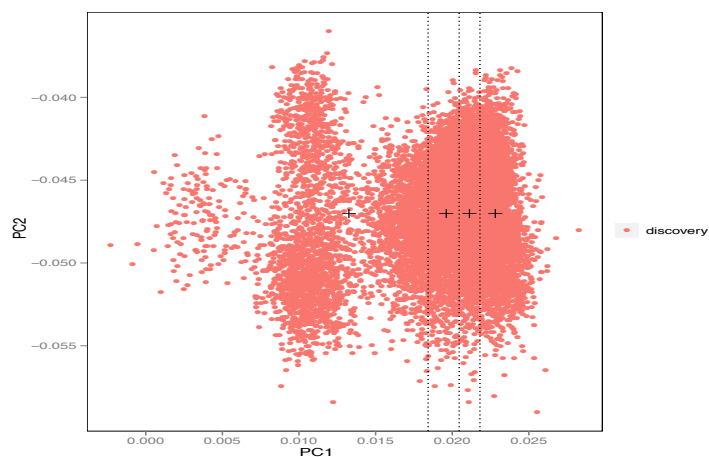

### B. Bipolar disorder

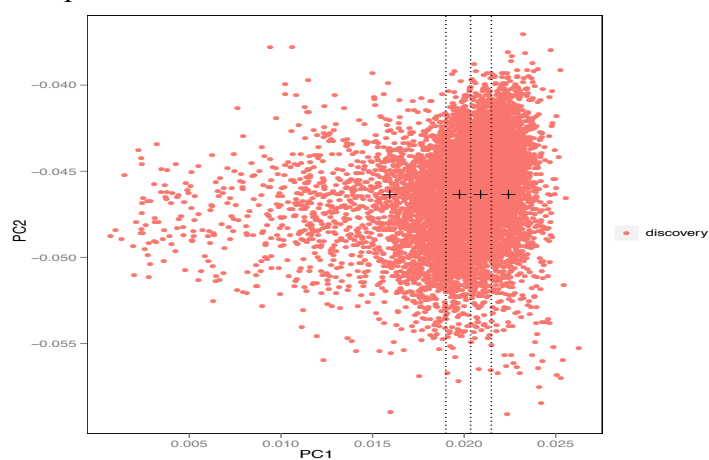

### C. Major depressive disorder

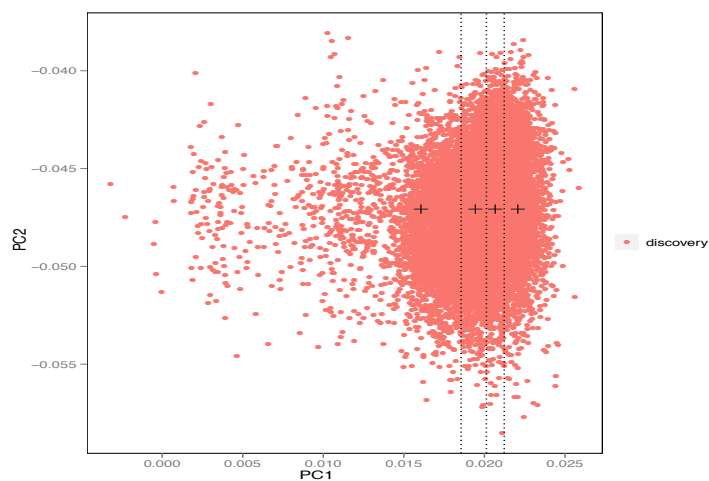

Figure S4. Principal component analysis based on the projected PC from POPRES for the discovery sample of SCZ (A), BIP (B) and MDD (C). The number of SNPs used to project PC was 745,705 for all three disorders. The dashed lines are 25%, 50% and 75% quartiles of the first principal component in the discovery sample (four population classes) and the plus sign is the mean (of PC1) of each population class. The four population classes for each trait were used in the reaction norm model (Appendix B).

### A. Schizophrenia

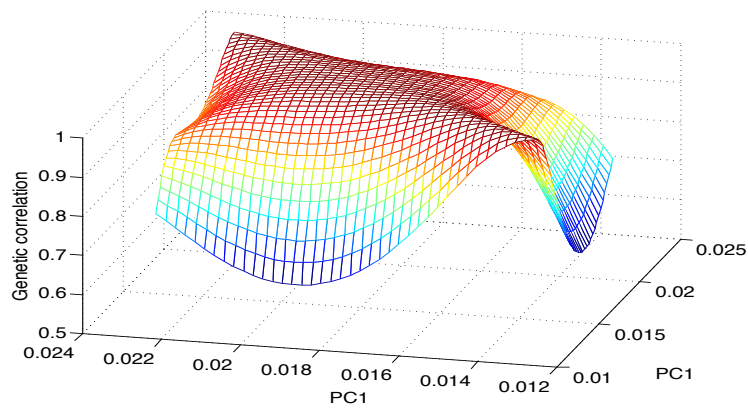

### B. Bipolar disorder

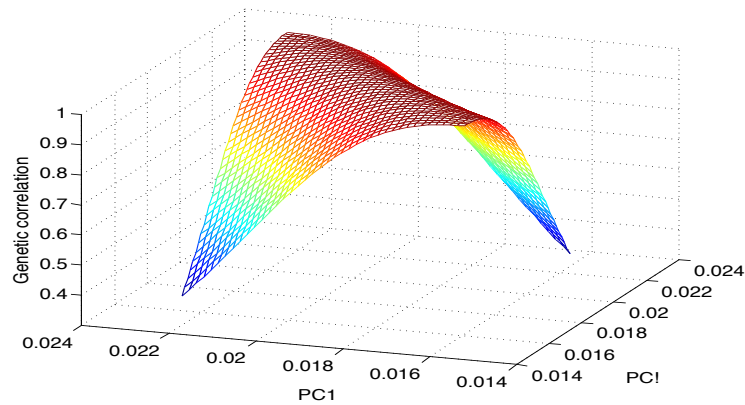

### C. Major depressive disorder

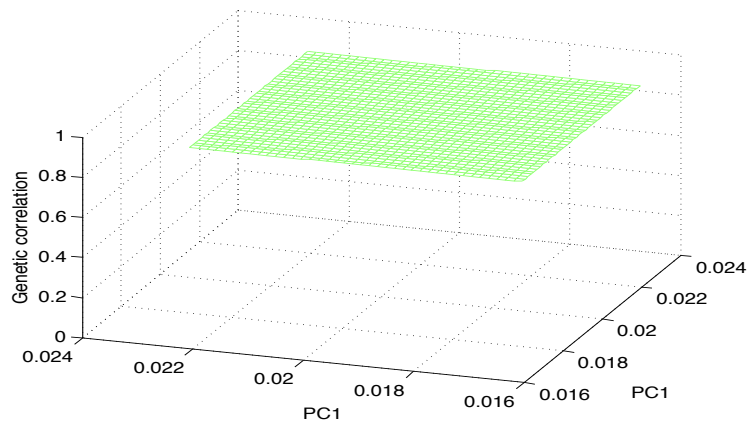

Figure S5. Genetic correlation pattern across different ancestry principal components estimated from the reaction norm model (Appendix B). Order of polynomial (see Table S9): A.  $k=3$  for SCZ, B.  $k=2$  for BIP, C.  $k=1$  for MDD.

### A. SCZ

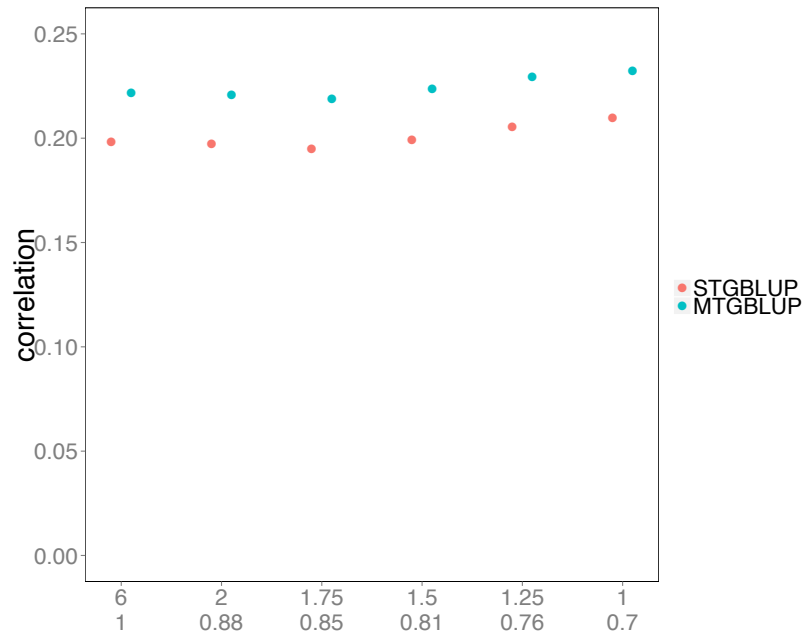

number of standard deviations from mean / fraction included

### B. BIP

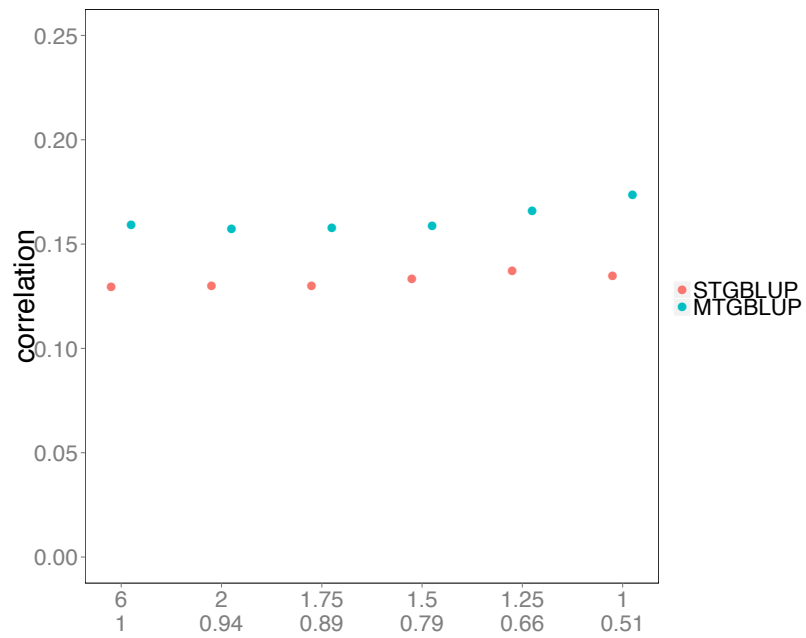

number of standard deviations from mean / fraction included



### C. MDD

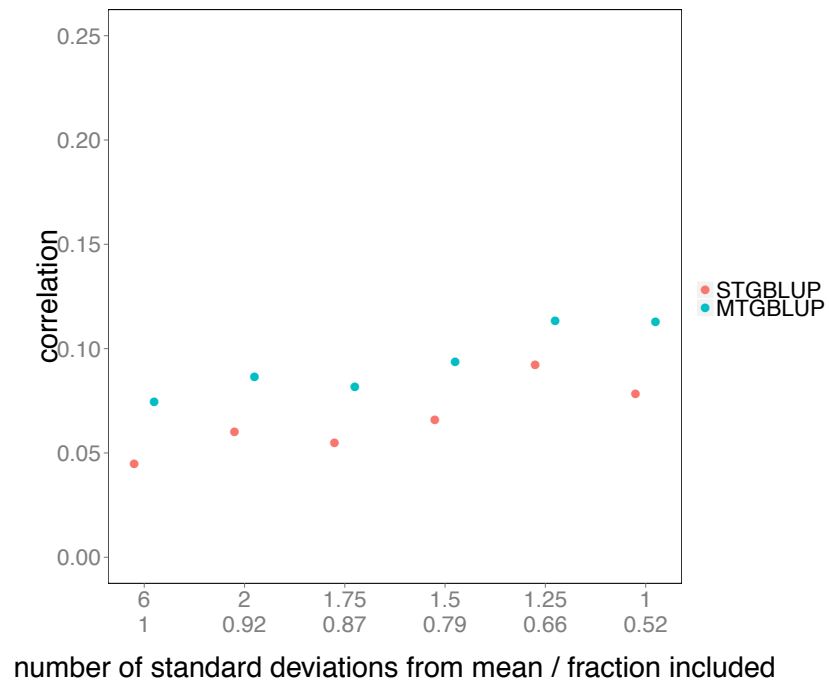

Figure S6. Effect of excluding population outliers on the prediction accuracy from MTGBLUP and STGBLUP. Outliers are defined as points  $\pm 6$ , 2, 1.75, 1.5, 1.25 and 1 SD from the mean for both the first and second principal components in the independent (A) SCZ, (B) BIP, (C) MDD samples.

Table S1. Comparison of prediction accuracy (Correlation) and regression coefficient (Regression) from MTGBLUP and STGBLUP for five psychiatric disorders in the within-study validation of PCG

|         | Correlation               | Regression    |
|---------|---------------------------|---------------|
|         | Schizophrenia             |               |
| STGBLUP | 0.240 (0.003)             | 1.011 (0.022) |
| MTGBLUP | 0.264 (0.003)             | 1.019 (0.019) |
|         | Bipolar disorder          |               |
| STGBLUP | 0.159 (0.005)             | 1.091 (0.054) |
| MTGBLUP | 0.204 (0.005)             | 0.971 (0.025) |
|         | Major depression          |               |
| STGBLUP | 0.125 (0.009)             | 1.078 (0.054) |
| MTGBLUP | 0.140 (0.007)             | 0.930 (0.038) |
|         | Autism Spectrum Disorders |               |
| STGBLUP | 0.075 (0.003)             | 0.965 (0.080) |
| MTGBLUP | 0.078 (0.006)             | 0.884 (0.054) |
|         | ADHD                      |               |
| STGBLUP | 0.141 (0.013)             | 1.144 (0.052) |
| MTGBLUP | 0.146 (0.013)             | 1.116 (0.050) |

Correlation and regression coefficients and empirical standard errors (in brackets) are calculated based on 5 replicates.

Table S2. Prediction accuracy for schizophrenia (SCZ), bipolar disorder (BIP) and major depressive disorder (MDD) in independent validation data sets when using the second annotation model.

|             | Correlation |       |       | Regression |       |       |
|-------------|-------------|-------|-------|------------|-------|-------|
|             | SCZ         | BIP   | MDD   | SCZ        | BIP   | MDD   |
| STGBLUP-SAI | 0.199       | 0.130 | 0.048 | 0.787      | 0.746 | 0.323 |
| MTGBLUP-SAI | 0.222       | 0.160 | 0.076 | 0.817      | 0.718 | 0.470 |

MTGBLUP-SAI or STGBLUP-SAI: in the SAI model SNPs are grouped into schizophrenia / autism / intellectual disability (SAI) candidate genes sets. Prediction accuracy is given as the correlation coefficient between the true disease status and the predicted genomic risk score in the validation data.

Table S3. Comparison of the fit of standard model with the SAI-annotation model for STGBLUP, MTGBLUP and MTGBLUP.

|         |             | SCZ               | BIP     | MDD    |
|---------|-------------|-------------------|---------|--------|
| $x_1$   | $x_2$       | p-values from LRT |         |        |
| STGBLUP | STGBLUP-SAI | 0.18              | 0.18    | 0.070  |
| MTGBLUP | MTGBLUP-SAI | 0.22              | 0.71    | 0.54   |
| STGBLUP | MTGBLUP-SAI | 1.2e-24           | 9.7E-15 | 0.0083 |

Likelihood ratio LR = -2 [ $\log L(x_1) - \log L(x_1 + x_2)$ ]

Table S4. SNP-heritability and genetic correlation between discovery and validation set from bivariate analyses for SCZ, BIP and MDD

| Trait 1/<br>trait 2              | Cases<br>T1/T2 | Controls<br>T1/T2 | Trait 1<br>$h^2$ (SE) | Trait 2<br>$h^2$ (SE) | $r_g$ (SE)     | p-value |
|----------------------------------|----------------|-------------------|-----------------------|-----------------------|----------------|---------|
| SCZ discovery/<br>SCZ validation | 8826/<br>4068  | 6106/<br>5471     | 0.23<br>(0.01)        | 0.21<br>(0.02)        | 0.80<br>(0.05) | 7.3E-51 |
| BIP discovery/<br>BIP validation | 5867/<br>2029  | 3328/<br>5338     | 0.21<br>(0.02)        | 0.22<br>(0.02)        | 0.75<br>(0.08) | 7.3E-17 |
| MDD discovery/<br>MDD validation | 8770/<br>822   | 6506/<br>467      | 0.28<br>(0.02)        | 0.11<br>(0.25)        | 0.51<br>(0.64) | 0.84    |

$h^2$  is SNP-heritability on the liability scale.  $r_g$  is genetic correlation between discovery/validation set. P-value is for testing if  $r_g$  is different from 1, indicating heterogeneity for a lower p-value.

Table S5. Reaction norm model to test heterogeneity across populations classified by the first ancestry principal component

| Polynomial order k | log L          | Number of parameters | LR           | p-value        |
|--------------------|----------------|----------------------|--------------|----------------|
| SCZ                |                |                      |              |                |
| 1                  | 3830.01        | 5                    | 0.00         | 1              |
| 2                  | 3836.61        | 7                    | 13.20        | 0.0014         |
| <b>3</b>           | <b>3840.55</b> | <b>10</b>            | <b>21.07</b> | <b>0.00078</b> |
| 4                  | 3841.36        | 14                   | 22.69        | 0.0069         |
| BIP                |                |                      |              |                |
| 1                  | 2342.89        | 5                    | 0.00         | 1              |
| <b>2</b>           | <b>2349.27</b> | <b>7</b>             | <b>12.76</b> | <b>0.0017</b>  |
| 3                  | 2351.64        | 10                   | 17.49        | 0.0037         |
| 4                  | 2352.77        | 14                   | 19.75        | 0.019          |
| MDD                |                |                      |              |                |
| <b>1</b>           | <b>3326.17</b> | <b>5</b>             | <b>0.00</b>  | <b>1</b>       |
| 2                  | 3326.39        | 7                    | 0.42         | 0.81           |
| 3                  | 3328.24        | 10                   | 4.14         | 0.53           |
| 4                  | 3330.98        | 14                   | 9.61         | 0.38           |

Populations are classified by the first ancestry principal component. Schizophrenia (p-value=0.00078) and bipolar disorder (p-value=0.0017) show a significant evidence for heterogeneity across different populations.

Table S6. Additional required sample size of STGBLUP to achieve the same prediction accuracy as MTGBLUP and MTGBLUP-CNS.

|             | SCZ                | BIP                | MDD                  |
|-------------|--------------------|--------------------|----------------------|
| MTGBLUP     | 4660 (3110 – 6270) | 5550 (2830 – 8640) | 10940 (730 – 24440)  |
| MTGBLUP-CNS | 5080 (3520 – 6690) | 6220 (3380 – 9380) | 11550 (1220 – 25300) |

Values in brackets are Ninety-five percent confidence interval (CI) is in bracket.

Table S7. Comparison of prediction accuracy (correlation) and regression coefficient (regression) from bivariate GBLUP (BVGBLUP)

| model              | Dependent variable | correlation | regression |
|--------------------|--------------------|-------------|------------|
| BVGBLUP (SCZ, BIP) | SCZ                | 0.220       | 0.822      |
| BVGBLUP (SCZ, BIP) | BIP                | 0.156       | 0.705      |
| BVGBLUP (SCZ, MDD) | SCZ                | 0.201       | 0.785      |
| BVGBLUP (SCZ, MDD) | MDD                | 0.071       | 0.461      |
| BVGBLUP (BIP, MDD) | BIP                | 0.133       | 0.682      |
| BVGBLUP (BIP, MDD) | MDD                | 0.040       | 0.263      |



Table S8. Results of model comparison between bi-variate (BVGBLUP) and multi-trait GBLUP (MTGBLUP).

| x1                 | x2      | Dependent variable | p-value |
|--------------------|---------|--------------------|---------|
| BVGBLUP (SCZ, BIP) | MTGBLUP | SCZ                | 1.9E-03 |
| BVGBLUP (SCZ, BIP) | MTGBLUP | BIP                | 7.4E-03 |
| BVGBLUP (SCZ, MDD) | MTGBLUP | SCZ                | 1.9E-23 |
| BVGBLUP (SCZ, MDD) | MTGBLUP | MDD                | 0.50    |
| BVGBLUP (BIP, MDD) | MTGBLUP | BIP                | 2.5E-14 |
| BVGBLUP (BIP, MDD) | MTGBLUP | MDD                | 0.00056 |

Likelihood ratio LR = -2 [logL(x1) - logL(x1+x2)]

Cross disorder Working group of the Psychiatric Genomics Consortium:

Devin Absher<sup>1</sup>, Ingrid Agartz<sup>2,3</sup>, Huda Akil<sup>4</sup>, Farooq Amin<sup>5</sup>, Ole A Andreassen<sup>2,6</sup>, Adebayo Anjorin<sup>7</sup>, Richard Anney<sup>8</sup>, Dan E Arking<sup>9</sup>, Philip Asherson<sup>10</sup>, Maria H Azevedo<sup>11</sup>, Lena Backlund<sup>12</sup>, Judith A Badner<sup>13</sup>, Anthony J Bailey<sup>14</sup>, Tobias Banaschewski<sup>15</sup>, Jack D Barchas<sup>16</sup>, Michael R Barnes<sup>17</sup>, Thomas B Barrett<sup>18</sup>, Nicholas Bass<sup>7</sup>, Agatino Battaglia<sup>19</sup>, Michael Bauer<sup>20</sup>, Mònica Bayés<sup>21</sup>, Frank Bellivier<sup>22,23</sup>, Sarah E Bergen<sup>24,25,26</sup>, Wade Berrettini<sup>27</sup>, Catalina Betancur<sup>28,29</sup>, Thomas Bettecken<sup>30</sup>, Joseph Biederman<sup>31</sup>, Elisabeth B Binder<sup>30</sup>, Donald W Black<sup>32</sup>, Douglas H R Blackwood<sup>33</sup>, Cinnamon S Bloss<sup>34,35</sup>, Michael Boehnke<sup>36,37</sup>, Dorret I Boomsma<sup>38,39</sup>, Gerome Breen<sup>10,40</sup>, René Breuer<sup>41</sup>, Richard Bruggeman<sup>42</sup>, Nancy G Buccola<sup>43</sup>, Jan K Buitelaar<sup>44</sup>, William E Bunney<sup>45</sup>, Joseph D Buxbaum<sup>46</sup>, William F Byerley<sup>47,48</sup>, Sian Caesar<sup>49</sup>, Wiepke Cahn<sup>50</sup>, Rita M Cantor<sup>51</sup>, Miguel Casas<sup>52,53</sup>, Aravinda Chakravarti<sup>9</sup>, Kimberly Chambert<sup>24</sup>, Khalid Choudhury<sup>7</sup>, Sven Cichon<sup>54,55</sup>, C Robert Cloninger<sup>56</sup>, David A Collier<sup>10</sup>, Edwin H Cook<sup>57</sup>, Hilary Coon<sup>58</sup>, Bru Cormand<sup>59,60</sup>, Paul Cormican<sup>8</sup>, Aiden Corvin<sup>8</sup>, William H Coryell<sup>32</sup>, Nicholas Craddock<sup>61,62</sup>, David W Craig<sup>63</sup>, Ian W Craig<sup>10</sup>, Jennifer Crosbie<sup>64</sup>, Michael L Cuccaro<sup>65</sup>, David Curtis<sup>66</sup>, Darina Czamara<sup>30,67</sup>, Mark J Daly<sup>24,68</sup>, Susmita Datta<sup>69</sup>, Geraldine Dawson<sup>70,71</sup>, Richard Day<sup>72</sup>, Eco J De Geus<sup>38,39</sup>, Franziska Degenhardt<sup>54,73</sup>, Bernie Devlin<sup>74</sup>, Srdjan Djurovic<sup>2,75</sup>, Gary J Donohoe<sup>8</sup>, Alysa E Doyle<sup>76</sup>, Jubao Duan<sup>77</sup>, Frank Dudbridge<sup>78</sup>, Eftichia Duketis<sup>79</sup>, Richard P Ebstein<sup>80</sup>, Howard J Edenberg<sup>81,82</sup>, Josephine Elia<sup>27,83</sup>, Sean Ennis<sup>84</sup>, Bruno Etain<sup>22,23,85,86</sup>, Ayman Fanous<sup>87,88</sup>, Stephen V Faraone<sup>89,90</sup>, Anne E Farmer<sup>10</sup>, I Nicol Ferrier<sup>91</sup>, Matthew Flickinger<sup>36,37</sup>, Eric Fombonne<sup>92,93</sup>, Tatiana Foroud<sup>82</sup>, Josef Frank<sup>41</sup>, Barbara Franke<sup>44</sup>, Christine Fraser<sup>61,62</sup>, Robert Freedman<sup>94</sup>, Nelson B Freimer<sup>95</sup>, Christine M Freitag<sup>79</sup>, Marion Friedl<sup>96</sup>, Louise Frisén<sup>12</sup>, Louise Gallagher<sup>8</sup>, Pablo V Gejman<sup>77</sup>, Lyudmila Georgieva<sup>61,62</sup>, Elliot S Gershon<sup>13</sup>, Daniel H Geschwind<sup>97,98</sup>, Ina Giegling<sup>96</sup>, Michael Gill<sup>8</sup>, Scott D Gordon<sup>99</sup>, Katherine Gordon-Smith<sup>49,61</sup>, Elaine K Green<sup>100</sup>, Tiffany A Greenwood<sup>101</sup>, Dorothy E Grice<sup>102,103</sup>, Magdalena Gross<sup>104</sup>, Detelina Grozeva<sup>61</sup>, Weihua Guan<sup>36,37,105</sup>, Hugh Gurling<sup>7</sup>, Lieuwe De Haan<sup>106</sup>, Jonathan L Haines<sup>107</sup>, Hakon Hakonarson<sup>108,109</sup>, Joachim Hallmayer<sup>110</sup>, Steven P Hamilton<sup>47</sup>, Marian L Hamshere<sup>61,111</sup>, Thomas F Hansen<sup>112,113</sup>, Annette M Hartmann<sup>96</sup>, Martin Hautzinger<sup>114</sup>, Andrew C Heath<sup>56</sup>, Anjali K Henders<sup>99</sup>, Stefan Herms<sup>54,55</sup>, Ian B Hickie<sup>115</sup>, Maria Hipolito<sup>116</sup>, Susanne Hoefels<sup>104</sup>, Peter A Holmans<sup>61,111</sup>, Florian Holsboer<sup>30</sup>, Witte J Hoogendijk<sup>117</sup>, Jouke-Jan Hottenga<sup>38,39</sup>, Christina M Hultman<sup>26</sup>, Vanessa Hus<sup>118</sup>, Andrés Ingason<sup>112,113</sup>, Marcus Ising<sup>30</sup>, Stéphane Jamain<sup>22,23,85,86</sup>, Ian Jones<sup>61,62</sup>, Lisa Jones<sup>49</sup>, Anna K Kähler<sup>26</sup>, René S Kahn<sup>50</sup>, Radhika Kandaswamy<sup>7</sup>, Matthew C Keller<sup>119</sup>, John R Kelsoe<sup>101,120</sup>, Kenneth S Kendler<sup>88,121,122</sup>, James L Kennedy<sup>123</sup>, Elaine Kenny<sup>8</sup>, Lindsey Kent<sup>124</sup>, Yunjung Kim<sup>125</sup>, George K Kirov<sup>61,62</sup>, Sabine M Klauck<sup>126</sup>, Lambertus Klei<sup>74</sup>, James A Knowles<sup>127</sup>, Martin A Kohli<sup>30</sup>, Daniel L Koller<sup>82</sup>, Bettina Konte<sup>96</sup>, Ania Korszun<sup>128</sup>, Lydia Krabbendam<sup>129</sup>, Robert Krasucki<sup>7</sup>, Jonna Kuntsi<sup>10</sup>, Phoenix Kwan<sup>36,37</sup>, Mikael Landén<sup>26,130</sup>, Niklas Långström<sup>26</sup>, Mark Lathrop<sup>131</sup>, Jacob Lawrence<sup>7</sup>, William B Lawson<sup>116</sup>, Marion Leboyer<sup>22,23,85,86</sup>, David H Ledbetter<sup>132</sup>, Phil H Lee<sup>25</sup>, Todd Lencz<sup>133,134,135</sup>, Klaus-Peter Lesch<sup>136,137</sup>, Douglas F Levinson<sup>138</sup>, Cathryn M Lewis<sup>10</sup>, Jun Li<sup>139</sup>, Paul Lichtenstein<sup>26</sup>, Jeffrey A Lieberman<sup>140</sup>, Dan-Yu Lin<sup>141</sup>, Don H Linszen<sup>142</sup>, Chunyu Liu<sup>143</sup>, Falk W Lohoff<sup>27</sup>, Sandra K Loo<sup>95,144</sup>, Catherine Lord<sup>145</sup>, Jennifer K Lowe<sup>97,98</sup>, Susanne Lucae<sup>30</sup>, Donald J MacIntyre<sup>33</sup>, Pamela AF Madden<sup>56</sup>, Elena Maestrini<sup>146</sup>, Patrik KE Magnusson<sup>26</sup>, Pamela B Mahon<sup>147</sup>, Wolfgang Maier<sup>104</sup>, Anil K Malhotra<sup>133,134,135</sup>, Shrikant M Mane<sup>148</sup>, Christa

L Martin<sup>132</sup>, Nicholas G Martin<sup>99</sup>, Manuel Mattheisen<sup>73,113,149,150</sup>, Keith Matthews<sup>72</sup>,  
 Morten Mattingsdal<sup>2,151</sup>, Steven A McCarroll<sup>24</sup>, Kevin A McGhee<sup>33</sup>, James J  
 McGough<sup>152</sup>, Patrick J McGrath<sup>140</sup>, Peter McGuffin<sup>10</sup>, Melvin G McInnis<sup>153</sup>, Andrew  
 McIntosh<sup>33,154</sup>, Rebecca McKinney<sup>101</sup>, Alan W McLean<sup>33,154</sup>, Francis J McMahon<sup>155</sup>,  
 William M McMahon<sup>58</sup>, Andrew McQuillin<sup>7</sup>, Helena Medeiros<sup>127</sup>, Sarah E  
 Medland<sup>99</sup>, Sandra Meier<sup>41</sup>, Ingrid Melle<sup>2,6</sup>, Fan Meng<sup>4</sup>, Jobst Meyer<sup>156</sup>, Christel M  
 Middeldorp<sup>38,39</sup>, Lefkos Middleton<sup>157</sup>, Vihra Milanova<sup>158</sup>, Ana Miranda<sup>159</sup>, Anthony P  
 Monaco<sup>160,161</sup>, Grant W Montgomery<sup>99</sup>, Jennifer L Moran<sup>24</sup>, Daniel Moreno-De-  
 Luca<sup>162</sup>, Gunnar Morken<sup>163,164</sup>, Derek W Morris<sup>8</sup>, Eric M Morrow<sup>165,166</sup>, Valentina  
 Moskvina<sup>61,111</sup>, Bryan J Mowry<sup>167,168</sup>, Pierandrea Muglia<sup>169</sup>, Thomas W  
 Mühleisen<sup>54,73,170</sup>, Bertram Müller-Myhsok<sup>30,67</sup>, Michael Murtha<sup>171</sup>, Richard M  
 Myers<sup>1</sup>, Inez Myin-Germeys<sup>129</sup>, Benjamin M Neale<sup>24,68</sup>, Stan F Nelson<sup>95</sup>, Caroline M  
 Nievergelt<sup>101</sup>, Ivan Nikolov<sup>61,62</sup>, Vishwajit Nimgaonkar<sup>172,173</sup>, Willem A Nolen<sup>174</sup>,  
 Markus M Nöthen<sup>54,73</sup>, John I Nurnberger<sup>82,175</sup>, Evaristus A Nwulia<sup>116</sup>, Dale R  
 Nyholt<sup>99</sup>, Michael C O'Donovan<sup>61,62</sup>, Colm O'Dushlaine<sup>24</sup>, Robert D Oades<sup>176</sup>, Ann  
 Olincy<sup>94</sup>, Guiomar Oliveira<sup>11,177</sup>, Line Olsen<sup>112,113</sup>, Roel A Ophoff<sup>95,178,179</sup>, Urban  
 Osby<sup>12</sup>, Michael J Owen<sup>61,62</sup>, Aarno Palotie<sup>180</sup>, Jeremy R Parr<sup>91</sup>, Andrew D  
 Paterson<sup>181,182</sup>, Carlos N Pato<sup>127</sup>, Michele T Pato<sup>127</sup>, Brenda W Penninx<sup>39,183,184</sup>,  
 Michele L Pergadia<sup>56</sup>, Margaret A Pericak-Vance<sup>65</sup>, Roy H Perlis<sup>24,25</sup>, Benjamin S  
 Pickard<sup>33,154</sup>, Jonathan Pimm<sup>7</sup>, Joseph Piven<sup>71</sup>, Danielle Posthuma<sup>185,186,187</sup>, James B  
 Potash<sup>32</sup>, Fritz Poustka<sup>79</sup>, Peter Propping<sup>73</sup>, Shaun M Purcell<sup>24,68,188</sup>, Vinay Puri<sup>7</sup>,  
 Digby J Quested<sup>189</sup>, Emma M Quinn<sup>8</sup>, Josep Antoni Ramos-Quiroga<sup>52,53</sup>, Henrik B  
 Rasmussen<sup>112,113</sup>, Soumya Raychaudhuri<sup>24,68</sup>, Karola Rehnström<sup>180</sup>, Andreas Reif<sup>190</sup>,  
 Marta Ribasés<sup>52,191</sup>, John P Rice<sup>192</sup>, Marcella Rietschel<sup>41</sup>, Stephan Ripke<sup>24,68</sup>, Kathryn  
 Roeder<sup>193</sup>, Herbert Roeyers<sup>194</sup>, Lizzy Rossin<sup>24</sup>, Aribert Rothenberger<sup>195</sup>, Guy  
 Rouleau<sup>196</sup>, Douglas Ruderfer<sup>188</sup>, Dan Rujescu<sup>96</sup>, Alan R Sanders<sup>77</sup>, Stephan J  
 Sanders<sup>162,171,197,198</sup>, Susan L Santangelo<sup>199,200</sup>, Russell Schachar<sup>64</sup>, Martin Schalling<sup>12</sup>,  
 Alan F Schatzberg<sup>201</sup>, William A Scheftner<sup>202</sup>, Gerard D Schellenberg<sup>203</sup>, Stephen W  
 Scherer<sup>204</sup>, Nicholas J Schork<sup>34,205</sup>, Thomas G Schulze<sup>147,206</sup>, Johannes Schumacher<sup>73</sup>,  
 Markus Schwarz<sup>207</sup>, Edward Scolnick<sup>24</sup>, Laura J Scott<sup>36,37</sup>, Joseph A Sergeant<sup>208</sup>,  
 Jianxin Shi<sup>209</sup>, Paul D Shilling<sup>101</sup>, Stanley I Shyn<sup>210</sup>, Jeremy M Silverman<sup>103</sup>, Pamela  
 Sklar<sup>188</sup>, Susan L Slager<sup>211</sup>, Susan L Smalley<sup>95,144</sup>, Johannes H Smit<sup>183,184</sup>, Erin N  
 Smith<sup>34,205</sup>, Jordan W Smoller<sup>24,25</sup>, Edmund JS Sonuga-Barke<sup>194,212</sup>, David St Clair<sup>213</sup>,  
 Matthew State<sup>162,171,197</sup>, Michael Steffens<sup>214</sup>, Hans-Christoph Steinhausen<sup>215,216,217</sup>,  
 John S Strauss<sup>218</sup>, Jana Strohmaier<sup>41</sup>, T Scott Stroup<sup>219</sup>, Patrick F Sullivan<sup>125</sup>, James  
 Sutcliffe<sup>220</sup>, Peter Szatmari<sup>221,222,223</sup>, Szabocs Szelinger<sup>63</sup>, Anita Thapar<sup>61,62</sup>, Srinivasa  
 Thirumalai<sup>224</sup>, Robert C Thompson<sup>4</sup>, Alexandre A Todorov<sup>56</sup>, Federica Tozzi<sup>169</sup>, Jens  
 Treutlein<sup>41</sup>, Jung-Ying Tzeng<sup>225</sup>, Manfred Uhr<sup>30</sup>, Edwin JCG van den Oord<sup>226</sup>, Gerard  
 Van Grootheest<sup>183,184</sup>, Jim Van Os<sup>129</sup>, Astrid M Vicente<sup>227,228,229</sup>, Veronica J  
 Vieland<sup>230</sup>, John B Vincent<sup>218</sup>, Peter M Visscher<sup>167,231</sup>, Christopher A  
 Walsh<sup>232,233,234,235</sup>, Thomas H Wassink<sup>32</sup>, Stanley J Watson<sup>4</sup>, Lauren A Weiss<sup>47</sup>,  
 Myrna M Weissman<sup>236</sup>, Thomas Werge<sup>112,113,237</sup>, Thomas F Wienker<sup>238</sup>, Durk  
 Wiersma<sup>42</sup>, Ellen M Wijsman<sup>239,240</sup>, Gonneke Willemsen<sup>38,183</sup>, Nigel Williams<sup>61,62</sup>, A  
 Jeremy Willsey<sup>171,197</sup>, Stephanie H Witt<sup>41</sup>, Naomi R Wray<sup>167</sup>, Wei Xu<sup>182</sup>, Allan H  
 Young<sup>91,241</sup>, Timothy W Yu<sup>242</sup>, Stanley Zammit<sup>61,62</sup>, Peter P Zandi<sup>243</sup>, Peng  
 Zhang<sup>36,37,153</sup>, Frans G Zitman<sup>244</sup>, Sebastian Zöllner<sup>36,37,153</sup>

<sup>1</sup>HudsonAlpha Institute of Biotechnology, Huntsville, Alabama, USA. <sup>2</sup>KG Jebsen Centre for Psychosis Research, Institute of Clinical Medicine, University of Oslo, Oslo, Norway. <sup>3</sup>Department of Research, Diakonhjemmet Hospital, Oslo, Norway. <sup>4</sup>Molecular Psychiatry Laboratory, Molecular and Behavioral Neuroscience Institute, University of Michigan, Ann Arbor, Michigan, USA. <sup>5</sup>Department of Psychiatry and Behavioral Sciences, Atlanta Veterans Affairs Medical Center, Emory University, Atlanta, Georgia, USA. <sup>6</sup>Division of Mental Health and Addiction, Oslo University Hospital, Oslo, Norway. <sup>7</sup>Mental Health Sciences Unit, University College London, London, UK. <sup>8</sup>Department of Psychiatry, Trinity College Dublin, Dublin, Ireland. <sup>9</sup>McKusick-Nathans Institute of Genetic Medicine, Johns Hopkins University School of Medicine, Baltimore, Maryland, USA. <sup>10</sup>MRC Social, Genetic and Developmental Psychiatry (SGDP) Centre, The Institute of Psychiatry, King's College London, London, UK. <sup>11</sup>Faculty of Medicine, University of Coimbra, Coimbra, Portugal. <sup>12</sup>Department of Molecular Medicine and Surgery, Center for Molecular Medicine, Karolinska Institutet, Stockholm, Sweden. <sup>13</sup>Department of Psychiatry, University of Chicago, Chicago, Illinois, USA. <sup>14</sup>Department of Psychiatry, University of British Columbia, Vancouver, British Columbia, Canada. <sup>15</sup>Department of Child and Adolescent Psychiatry and Psychotherapy, Central Institute of Mental Health, Medical Faculty Mannheim, University of Heidelberg, Mannheim, Germany. <sup>16</sup>Department of Psychiatry, Weill Medical College, Cornell University, New York, New York, USA. <sup>17</sup>GlaxoSmithKline, London, UK. <sup>18</sup>Portland Veterans Affairs Medical Center, Portland, Oregon, USA. <sup>19</sup>Stella Maris Institute for Child and Adolescent Neuropsychiatry, Calambrone, Pisa, Italy. <sup>20</sup>Department of Psychiatry and Psychotherapy, Carl Gustav Carus University Hospital, Dresden, Germany. <sup>21</sup>Centro Nacional de Análisis Genómico (CNAG), Parc Científic de Barcelona (PCB), Barcelona, Spain. <sup>22</sup>Institut National de la Santé et de la Recherche Médicale (INSERM) U955, Psychiatrie Génétique, Créteil, France. <sup>23</sup>ENBREC (European Network of Bipolar Research Expert Centres) Group, Fondation FondaMental, Créteil, France. <sup>24</sup>Stanley Center for Psychiatric Research, Broad Institute of MIT and Harvard, Cambridge, Massachusetts, USA. <sup>25</sup>Psychiatric and Neurodevelopmental Genetics Unit, Massachusetts General Hospital, Boston, Massachusetts, USA. <sup>26</sup>Department of Medical Epidemiology and Biostatistics, Karolinska Institutet, Stockholm, Sweden. <sup>27</sup>Department of Psychiatry, University of Pennsylvania, Philadelphia, Pennsylvania, USA. <sup>28</sup>INSERM U952, Paris, France. <sup>29</sup>Université Pierre et Marie Curie, Paris, France. <sup>30</sup>Max Planck Institute of Psychiatry, Munich, Germany. <sup>31</sup>Clinical and Research Programs in Pediatric Psychopharmacology and Adult ADHD, Massachusetts General Hospital and Harvard Medical School, Boston, Massachusetts, USA. <sup>32</sup>Department of Psychiatry, University of Iowa, Iowa City, Iowa, USA. <sup>33</sup>Division of Psychiatry, University of Edinburgh, Royal Edinburgh Hospital, Edinburgh, UK. <sup>34</sup>The Scripps Translational Science Institute, La Jolla, California, USA. <sup>35</sup>Scripps Health, La Jolla, California, USA. <sup>36</sup>Department of Biostatistics, School of Public Health, University of Michigan, Ann Arbor, Michigan, USA. <sup>37</sup>Center for Statistical Genetics, School of Public Health, University of Michigan, Ann Arbor, Michigan, USA. <sup>38</sup>Department of Biological Psychology, VU University, Amsterdam, The Netherlands. <sup>39</sup>Neuroscience Campus Amsterdam, Amsterdam, The Netherlands. <sup>40</sup>National Institute of Health Research (NIHR) Biomedical Research Centre for Mental Health, South London, London, UK and Maudsley National Health Service (NHS) Trust and Institute of Psychiatry, London, UK. <sup>41</sup>Department of Genetic Epidemiology in Psychiatry, Central Institute of Mental Health, Medical Faculty Mannheim, Heidelberg University, Mannheim,

Germany.<sup>42</sup>Department of Psychiatry, University Medical Center Groningen, University of Groningen, Groningen, The Netherlands.<sup>43</sup>School of Nursing, Louisiana State University Health Sciences Center, New Orleans, Louisiana, USA.

<sup>44</sup>Department of Cognitive Neuroscience, Donders Institute for Brain, Cognition and Behavior, Radboud University Medical Centre, Nijmegen, The Netherlands.<sup>45</sup>Department of Psychiatry and Human Behavior, University of California–Irvine, Irvine, California, USA. <sup>46</sup>Seaver Autism Center for Research and Treatment, Department of Psychiatry, Icahn School of Medicine at Mount Sinai, New York, New York, USA.<sup>47</sup>Department of Psychiatry, University of California, San Francisco, San Francisco, California, USA. <sup>48</sup>NCIRE (Northern California Institute of Q Research and Education), San Francisco, California, USA. <sup>49</sup>Department of Psychiatry, Birmingham University, Birmingham, UK.<sup>50</sup>Department of Psychiatry, Rudolf Magnus Institute of Neuroscience, University Medical Center, Utrecht, The Netherlands.<sup>51</sup>David Geffen School of Medicine, University of California, Los Angeles, Los Angeles, California, USA. <sup>52</sup>Department of Psychiatry, Hospital Universitari Vall d’Hebron, CIBERSAM (Centro de Investigación Biomédica en el Area de Salud Mental), Barcelona, Spain. <sup>53</sup>Department of Psychiatry and Legal Medicine, Universitat Autònoma de Barcelona, Barcelona, Spain.<sup>54</sup>Department of Genomics, Life & Brain Center, University of Bonn, Bonn, Germany. <sup>55</sup>Division of Medical Genetics, Department of Biomedicine, University of Basel, Basel, Switzerland. <sup>56</sup>Department of Psychiatry, Washington University School of Medicine, St. Louis, Missouri, USA. <sup>57</sup>Department of Psychiatry, Institute for Juvenile Research, University of Illinois, Chicago, Illinois, USA.<sup>58</sup>Department of Psychiatry, University of Utah, Salt Lake City, Utah, USA. <sup>59</sup>Departament de Genètica, Facultat de Biologia, Universitat de Barcelona, Barcelona, Spain. <sup>60</sup>Institut de Biomedicina de la Universitat de Barcelona (IBUB), Barcelona, Spain.<sup>61</sup>Medical Research Council (MRC) Centre for Neuropsychiatric Genetics and Genomics, Cardiff University School of Medicine, Cardiff, UK.<sup>62</sup>Institute of Psychological Medicine and Clinical Neurosciences, Cardiff University School of Medicine, Cardiff, UK. <sup>63</sup>The Translational Genomics Research Institute, Phoenix, Arizona, USA.<sup>64</sup>Neurosciences and Mental Health Program, The Hospital for Sick Children, University of Toronto, Toronto, Ontario, Canada.<sup>65</sup>John P. Hussman Institute for Human Genomics, University of Miami, Miami, Florida, USA. <sup>66</sup>East London NHS Foundation Trust, Queen Mary, University of London, London, UK. <sup>67</sup>Munich Cluster for Systems Neurology (SyNergy), Munich, Germany.<sup>68</sup>Analytic and Translational Genetics Unit, Massachusetts General Hospital and Harvard Medical School, Boston, Massachusetts, USA. <sup>69</sup>Genetics Institute, University College London, London, UK. <sup>70</sup>Autism Speaks, New York, New York, USA. <sup>71</sup>Carolina Institute for Developmental Disabilities, University of North Carolina at Chapel Hill, Chapel Hill, North Carolina, USA.<sup>72</sup>Division of Neuroscience, Medical Research Institute, University of Dundee, Ninewells Hospital & Medical School, Dundee, UK. <sup>73</sup>Institute of Human Genetics, University of Bonn, Bonn, Germany. <sup>74</sup>Department of Psychiatry, University of Pittsburgh School of Medicine, Pittsburgh, Pennsylvania, USA.<sup>75</sup>Department of Medical Genetics, Oslo University Hospital, Oslo, Norway. <sup>76</sup>Psychiatric and Neurodevelopmental Genetics Unit, Massachusetts General Hospital and Harvard Medical School, Boston, Massachusetts, USA. <sup>77</sup>Department of Psychiatry and Behavioral Sciences, NorthShore University Health System and University of Chicago, Evanston, Illinois, USA. <sup>78</sup>Department of Non-Communicable Disease Epidemiology, London School of Hygiene and Tropical Medicine, London, UK. <sup>79</sup>Department of Child and Adolescent Psychiatry, Psychosomatics and

Psychotherapy, JW Goethe University Frankfurt, Frankfurt, Germany. <sup>80</sup>Psychology Department, National University of Singapore, Singapore. <sup>81</sup>Department of Biochemistry and Molecular Biology, Indiana University School of Medicine, Indianapolis, Indiana, USA. <sup>82</sup>Department of Medical and Molecular Genetics, Indiana University School of Medicine, Indianapolis, Indiana, USA. <sup>83</sup>AI Dupont Hospital for Children, University of Pennsylvania, Philadelphia, Pennsylvania, USA. <sup>84</sup>School of Medicine, Medical Science University College, Dublin, Ireland. <sup>85</sup>Université Paris Est, Faculté de Médecine, Créteil, France. <sup>86</sup>AP-HP, Hôpital H Mondor–A Chenevier, Département de Psychiatrie, Créteil, France. <sup>87</sup>Department of Psychiatry, Georgetown University School of Medicine, Washington, DC, USA. <sup>88</sup>Virginia Institute of Psychiatric and Behavioral Genetics, Virginia Commonwealth University, Richmond, Virginia, USA. <sup>89</sup>Department of Psychiatry, State University of New York (SUNY) Upstate Medical University, Syracuse, New York, USA. <sup>90</sup>Department of Neuroscience and Physiology, SUNY Upstate Medical University, Syracuse, New York, USA. <sup>91</sup>Institute of Neuroscience, Newcastle University, Newcastle upon Tyne, UK. <sup>92</sup>Department of Psychiatry, Oregon Health & Science University, Portland, Oregon, USA. <sup>93</sup>Institute for Development & Disability, Oregon Health & Science University, Portland, Oregon, USA. <sup>94</sup>Department of Psychiatry, University of Colorado Denver, Aurora, Colorado, USA. <sup>95</sup>Center for Neurobehavioral Genetics, University of California, Los Angeles, Los Angeles, California, USA. <sup>96</sup>Department of Psychiatry, University of Halle, Halle, Germany. <sup>97</sup>Department of Neurology, David Geffen School of Medicine, University of California, Los Angeles, Los Angeles, California, USA. <sup>98</sup>Center for Autism Research and Treatment, Semel Institute, David Geffen School of Medicine, University of California, Los Angeles, Los Angeles, California, USA. <sup>99</sup>Queensland Institute of Medical Research, Brisbane, Queensland, Australia. <sup>100</sup>Department of Biomedical and Biological Sciences, Plymouth University, Plymouth, UK. <sup>101</sup>Department of Psychiatry, University of California, San Diego, La Jolla, California, USA. <sup>102</sup>Division of Tics, OCD and Related Disorders, Icahn School of Medicine at Mount Sinai, New York, New York, USA. <sup>103</sup>Department of Psychiatry, Icahn School of Medicine at Mount Sinai, New York, New York, USA. <sup>104</sup>Department of Psychiatry, University of Bonn, Bonn, Germany. <sup>105</sup>Division of Biostatistics, University of Minnesota, Minneapolis, Minnesota, USA. <sup>106</sup>Department of Psychiatry, Academic Medical Centre, University of Amsterdam The Netherlands. <sup>107</sup>Center for Human Genetics Research, Vanderbilt University Medical Center, Nashville, Tennessee, USA. <sup>108</sup>The Center for Applied Genomics, Division of Human Genetics, The Children's Hospital of Philadelphia, Philadelphia, Pennsylvania, USA. <sup>109</sup>Department of Pediatrics, University of Pennsylvania School of Medicine, Philadelphia, Pennsylvania, USA. <sup>110</sup>Department of Psychiatry, School of Medicine, Stanford University, Stanford, California, USA. <sup>111</sup>Biostatistics and Bioinformatics Unit, Cardiff University, Cardiff, UK. <sup>112</sup>Institute of Biological Psychiatry, Copenhagen University Hospital, Roskilde, Denmark. <sup>113</sup>The Lundbeck Initiative for Integrative Psychiatric Research, iPSYCH, Roskilde, Denmark. <sup>114</sup>Department of Clinical and Developmental Psychology, Eberhard Karls University of Tübingen, Tübingen, Germany. <sup>115</sup>Brain and Mind Research Institute, University of Sydney, Sydney, New South Wales, Australia. <sup>116</sup>Department of Psychiatry and Behavioral Sciences, Howard University College of Medicine, Washington, DC, USA. <sup>117</sup>Department of Psychiatry, Erasmus Medical Center, Rotterdam, The Netherlands. <sup>118</sup>Department of Psychology, University of Michigan, Ann Arbor, Michigan, USA. <sup>119</sup>Department of Psychology, University of Colorado, Boulder,

Colorado, USA.<sup>120</sup>Department of Psychiatry, Special Treatment and Evaluation Program (STEP), Veterans Affairs San Diego Healthcare System, San Diego, California, USA.<sup>121</sup>Department of Human and Molecular Genetics, Virginia Commonwealth University, Richmond, Virginia, USA.<sup>122</sup>Department of Psychiatry, Virginia Commonwealth University, Richmond, Virginia, USA.<sup>123</sup>Psychiatric Neurogenetics Section, Centre for Addiction and Mental Health, Toronto, Ontario, Canada.<sup>124</sup>School of Medicine, University of St Andrews, St Andrews, UK.<sup>125</sup>Department of Genetics, University of North Carolina at Chapel Hill, Chapel Hill, North Carolina, USA.<sup>126</sup>Division of Molecular Genome Analysis, German Cancer Research Center (DKFZ), Heidelberg, Germany.<sup>127</sup>Department of Psychiatry, Zilkha Neurogenetic Institute, Keck School of Medicine, University of Southern California, Los Angeles, California, USA.<sup>128</sup>Wolfson Institute of Preventive Medicine, Queen Mary University of London, London, UK.<sup>129</sup>Department of Psychiatry and Neuropsychology, Maastricht University Medical Centre, South Limburg Mental Health Research and Teaching Network, Maastricht, The Netherlands.<sup>130</sup>Institute of Neuroscience and Physiology, University of Gothenburg, Gothenburg, Sweden.<sup>131</sup>Centre National de Genotypage, Evry, France.<sup>132</sup>Geisinger Health System, Autism and Developmental Medicine Institute, Danville, Pennsylvania, USA.<sup>133</sup>Department of Psychiatry, Division of Research, The Zucker Hillside Hospital Division of the North Shore, Long Island Jewish Health System, Glen Oaks, New York, USA.<sup>134</sup>Center for Psychiatric Neuroscience, The Feinstein Institute of Medical Research, Manhasset, New York, USA.<sup>135</sup>Department of Psychiatry and Behavioral Science, Albert Einstein College of Medicine of Yeshiva University, Bronx, New York, USA.<sup>136</sup>Division of Molecular Psychiatry, ADHD Clinical Research Unit, Department of Psychiatry, Psychosomatics and Psychotherapy, University of Würzburg, Würzburg, Germany.<sup>137</sup>Department of Psychiatry and Psychology, School for Mental Health and Neuroscience (MHENS), Maastricht University, Maastricht, The Netherlands.<sup>138</sup>Department of Psychiatry and Behavioral Sciences, Stanford University, Stanford, California, USA.<sup>139</sup>Department of Human Genetics, University of Michigan, Ann Arbor, Michigan, USA.<sup>140</sup>New York State Psychiatric Institute, Columbia University, New York, New York, USA.<sup>141</sup>Department of Biostatistics, University of North Carolina at Chapel Hill, Chapel Hill, North Carolina, USA.<sup>142</sup>Department of Psychiatry, Academic Medical Centre University of Amsterdam, Amsterdam, The Netherlands.<sup>143</sup>Department of Psychiatry, Institute of Human Genetics, University of Illinois at Chicago, Chicago, Illinois, USA.<sup>144</sup>Department of Psychiatry and Biobehavioral Science, University of California, Los Angeles, Los Angeles, California, USA.<sup>145</sup>Center for Autism and the Developing Brain, Weill Cornell Medical College, White Plains, New York, USA.<sup>146</sup>Department of Pharmacy and Biotechnology, University of Bologna, Bologna, Italy.<sup>147</sup>Department of Psychiatry & Behavioral Sciences, Johns Hopkins University, Baltimore, Maryland, USA.<sup>148</sup>Yale Center for Genome Analysis, Orange, Connecticut, USA.<sup>149</sup>Department of Biomedicine, Aarhus University, Aarhus, Denmark.<sup>150</sup>Department of Genomic Mathematics, University of Bonn, Bonn, Germany.<sup>151</sup>Sørlandet Hospital, Kristiansand, Norway.<sup>152</sup>Child and Adolescent Psychiatry, Semel Institute, David Geffen School of Medicine, University of California, Los Angeles, Los Angeles, California, USA.<sup>153</sup>Department of Psychiatry, University of Michigan, Ann Arbor, Michigan, USA.<sup>154</sup>Molecular Medicine Centre, University of Edinburgh, Edinburgh, UK.<sup>155</sup>National Institute of Mental Health, US National Institutes of Health, Bethesda, Maryland, USA.<sup>156</sup>Department of Neurobehavioral Genetics, Trier University, Trier, Germany.<sup>157</sup>Neuroepidemiology and Ageing Research, School of Public Health,

Imperial College London, London, UK. <sup>158</sup>Department of Psychiatry, First Psychiatric Clinic, Alexander University Hospital, Sofia, Bulgaria. <sup>159</sup>Department of Developmental and Educational Psychology, University of Valencia, Valencia, Spain. <sup>160</sup>Wellcome Trust Centre for Human Genetics, University of Oxford, Oxford, UK. <sup>161</sup>Office of the President, Tufts University, Medford, Massachusetts, USA. <sup>162</sup>Department of Psychiatry, Yale University, New Haven, Connecticut, USA. <sup>163</sup>Department of Psychiatry, St. Olavs Hospital, Trondheim, Norway. <sup>164</sup>Department of Neuroscience, Norwegian University of Science and Technology, Trondheim, Norway. <sup>165</sup>Department of Molecular Biology, Cell Biology and Biochemistry, Brown University, Providence, Rhode Island, USA. <sup>166</sup>Department of Psychiatry and Human Behavior, Brown University, Providence, Rhode Island, USA. <sup>167</sup>The University of Queensland, Queensland Brain Institute, Brisbane, Queensland, Australia. <sup>168</sup>Queensland Centre for Mental Health Research, Wacol, Queensland, Australia. <sup>169</sup>Neurosciences Centre of Excellence in Drug Discovery, GlaxoSmithKline Research and Development, Verona, Italy. <sup>170</sup>Life & Brain Center, University of Bonn, Bonn, Germany. <sup>171</sup>Child Study Center, Yale University, New Haven, Connecticut, USA. <sup>172</sup>Department of Psychiatry, University of Pittsburgh, Pittsburgh, Pennsylvania, USA. <sup>173</sup>Department of Human Genetics, University of Pittsburgh, Pittsburgh, Pennsylvania, USA. <sup>174</sup>Department of Psychiatry, Groningen University Medical Center, Groningen, The Netherlands. <sup>175</sup>Department of Psychiatry, Indiana University School of Medicine, Indianapolis, Indiana, USA. <sup>176</sup>Clinic for Child and Adolescent Psychiatry and Psychotherapy, University of Duisburg-Essen, Essen, Germany. <sup>177</sup>Research and Clinical Training Department, Pediatric Hospital, Centro Hospitalar e Universitário Coimbra, Coimbra, Portugal. <sup>178</sup>Department of Human Genetics, University of California, Los Angeles, Los Angeles, California, USA. <sup>179</sup>Department of Psychiatry, University Medical Center Utrecht, Utrecht, The Netherlands. <sup>180</sup>Sanger Institute, Hinxton, Cambridge, UK. <sup>181</sup>Program in Genetics and Genomic Biology, The Hospital for Sick Children, Toronto, Ontario, Canada. <sup>182</sup>Dalla Lana School of Public Health, University of Toronto, Toronto, Ontario, Canada. <sup>183</sup>EMGO+ (ExtraMuraalGeneeskundig Onderzoek) Institute for Health and Care Research, Amsterdam, The Netherlands. <sup>184</sup>Department of Psychiatry, VU University Medical Center, Amsterdam, The Netherlands. <sup>185</sup>Department of Functional Genomics, VU University, Amsterdam, The Netherlands. <sup>186</sup>Department of Clinical Genetics, VU Medical Center, Amsterdam, The Netherlands. <sup>187</sup>Department of Child and Adolescent Psychiatry, Erasmus University Medical Center, Rotterdam, The Netherlands. <sup>188</sup>Division of Psychiatric Genomics, Department of Psychiatry, Icahn School of Medicine at Mount Sinai, New York, New York, USA. <sup>189</sup>Academic Department of Psychiatry, University of Oxford, Oxford, UK. <sup>190</sup>Department of Psychiatry, Psychosomatic Medicine and Psychotherapy, University Hospital Frankfurt, Goethe-University Frankfurt, Frankfurt am Main, Germany. <sup>191</sup>Psychiatric Genetics Unit, Vall d'Hebron Research Institute, Barcelona, Spain. <sup>192</sup>Division of Biostatistics, Washington University School of Medicine, St. Louis, Missouri, USA. <sup>193</sup>Department of Statistics, Carnegie Mellon University, Pittsburgh, Pennsylvania, USA. <sup>194</sup>Department of Experimental Clinical & Health Psychology, Ghent University, Ghent, Belgium. <sup>195</sup>Child and Adolescent Psychiatry, University Medicine Göttingen, Göttingen, Germany. <sup>196</sup>Department of Neurology and Neurosurgery, McGill University, Montreal, Quebec, Canada. <sup>197</sup>Department of Genetics, Yale University, New Haven, Connecticut, USA. <sup>198</sup>Program on Neurogenetics, Yale University, New Haven, Connecticut, USA. <sup>199</sup>Department of Psychiatry, Maine Medical Center, Portland, Maine,



USA.<sup>200</sup> Department of Psychiatry, Harvard Medical School, Boston, Massachusetts, USA.<sup>201</sup> Department of Psychiatry and Behavioral Science, Stanford University School of Medicine, Palo Alto, California, USA.<sup>202</sup> Rush Ambulatory Behavioral Health, Rush University Medical Center, Chicago, Illinois, USA.<sup>203</sup> Department of Pathology and Laboratory Medicine, University of Pennsylvania, Philadelphia, Pennsylvania, USA.<sup>204</sup> The Centre for Applied Genomics, The Hospital for Sick Children, Toronto, Ontario, Canada.<sup>205</sup> The Scripps Research Institute, La Jolla, California, USA.<sup>206</sup> Department of Psychiatry & Psychotherapy, University of Göttingen, Göttingen, Germany.<sup>207</sup> Psychiatric Center Nordbaden, Wiesloch, Germany.<sup>208</sup> Department of Clinical Neuropsychology, VU University, Amsterdam, The Netherlands.<sup>209</sup> Division of Cancer Epidemiology and Genetics, National Cancer Institute, Bethesda, Maryland, USA.<sup>210</sup> Department of Psychiatry and Behavioral Sciences, University of Washington, Seattle, Washington, USA.<sup>211</sup> Mayo Clinic, Rochester, Minnesota, USA.<sup>212</sup> Developmental Brain & Behaviour Laboratory, Academic Unit of Psychology, University of Southampton, Southampton, UK.<sup>213</sup> Institute of Medical Sciences, University of Aberdeen, Foresterhill, Aberdeen, UK.<sup>214</sup> Research Department, Federal Institute for Drugs and Medical Devices (BfArM), Bonn, Germany.<sup>215</sup> Research Unit of Child and Adolescent Psychiatry, Aalborg University Hospital, Aalborg, Denmark.<sup>216</sup> Clinical Psychology and Epidemiology, University of Basel, Basel, Switzerland.<sup>217</sup> Department of Child and Adolescent Psychiatry, University of Zurich, Zurich, Switzerland.<sup>218</sup> Molecular Neuropsychiatry and Development Laboratory, Centre for Addiction and Mental Health, Toronto, Ontario, Canada.<sup>219</sup> Department of Psychiatry, Columbia University, New York, New York, USA.<sup>220</sup> Vanderbilt Brain Institute, Vanderbilt University, Nashville, Tennessee, USA.<sup>221</sup> Department of Psychiatry, University of Toronto, Toronto, Ontario Canada.<sup>222</sup> Neurosciences and Mental Health Program, Hospital for Sick Children, Toronto, Ontario Canada.<sup>223</sup> Centre for Addiction and Mental Health, Toronto, Ontario, Canada.<sup>224</sup> Oxford Health NHS Foundation Trust, Marlborough House Secure Unit, Milton Keynes, UK.<sup>225</sup> Bioinformatics Research Center, North Carolina State University, Raleigh, North Carolina, USA.<sup>226</sup> Center for Biomarker Research and Personalized Medicine, Virginia Commonwealth University, Richmond, Virginia, USA.<sup>227</sup> Instituto Nacional de Saude Dr Ricardo Jorge, Lisbon, Portugal.<sup>228</sup> BioFIG—Center for Biodiversity, Functional and Integrative Genomics, Campus da FCUL, Campo Grande, Lisbon, Portugal.<sup>229</sup> Instituto Gulbenkian de Ciência, Lisbon, Portugal.<sup>230</sup> Battelle Center for Mathematical Medicine, Nationwide Children's Hospital, Columbus, Ohio, USA.<sup>231</sup> The University of Queensland, Diamantina Institute, Brisbane, Queensland, Australia.<sup>232</sup> Howard Hughes Medical Institute, Children's Hospital Boston, Boston, Massachusetts, USA.<sup>233</sup> Division of Genetics, Children's Hospital Boston, Boston, Massachusetts, USA.<sup>234</sup> Department of Neurology, Harvard Medical School Center for Life Sciences, Boston, Massachusetts, USA.<sup>235</sup> Department of Pediatrics, Harvard Medical School Center for Life Sciences, Boston, Massachusetts, USA.<sup>236</sup> Columbia University College of Physicians and Surgeons, New York, New York, USA.<sup>237</sup> Faculty of Health and Medical Science, University of Copenhagen, Copenhagen, Denmark.<sup>238</sup> Institute of Medical Biometry, University of Bonn, Bonn, Germany.<sup>239</sup> Department of Biostatistics, University of Washington, Seattle, Washington, USA.<sup>240</sup> Department of Medicine, University of Washington, Seattle, Washington, USA.<sup>241</sup> Centre for Affective Disorders, Institute of Psychiatry, King's College London, London, UK.<sup>242</sup> Division of Genetics, Children's Hospital Boston, Harvard Medical School, Boston, Massachusetts, USA.<sup>243</sup> Department of Mental Health, Johns Hopkins University, Baltimore,

Maryland, USA.<sup>244</sup>Department of Psychiatry, Leiden University Medical Center,  
Leiden, The Netherlands.
